# Supplementary material
Source: publisher figshare collection journal article supplement (https://gsajournals.figshare.com/ndownloader/files/30723374)
Supplement: Supplementary file 1 [file 30723374]

LOCUS       pBphi_kni_KD_p2_MS2_ye 13707 bp ds-DNA     circular     18-MAR-2021
DEFINITION  .
ACCESSION   urn.local...1376422232321.8 (modified)                             
VERSION     urn.local...1376422232321.8                                        
FEATURES             Location/Qualifiers
     enhancer        292..1161
                     /label="kni_KD_minus_enhancer"
                     /ApEinfo_revcolor=#ffef86
                     /ApEinfo_fwdcolor=#ffef86
     promoter        1162..1287
                     /label="kni_promoter2"
                     /ApEinfo_revcolor=#faac61
                     /ApEinfo_fwdcolor=#faac61
     misc_feature    1288..2589
                     /label="StableMS2Repeats"
                     /ApEinfo_revcolor=#84b0dc
                     /ApEinfo_fwdcolor=#84b0dc
     misc_feature    1289..2589
                     /label="ATCCC"
                     /ApEinfo_revcolor=#d59687
                     /ApEinfo_fwdcolor=#d59687
     exon            2590..3329
                     /label="YellowExon1"
                     /ApEinfo_revcolor=#b7e6d7
                     /ApEinfo_fwdcolor=#b7e6d7
     intron          3330..6027
                     /label="YellowIntron"
                     /ApEinfo_revcolor=#b7e6d7
                     /ApEinfo_fwdcolor=#b7e6d7
     intron          6028..6918
                     /label="YellowExon2"
                     /ApEinfo_revcolor=#c7b0e3
                     /ApEinfo_fwdcolor=#c7b0e3
     3'UTR           6919..7731
                     /label="SV40 A-tubulin end"
                     /ApEinfo_revcolor=#ff9ccd
                     /ApEinfo_fwdcolor=#ff9ccd
     CDS             8703..11280
                     /label="mini-white"
                     /ApEinfo_revcolor=#75c6a9
                     /ApEinfo_fwdcolor=#75c6a9
     gene            join(12893..13707,1..43)
                     /label="Ampicillin"
                     /ApEinfo_revcolor=#b4abac
                     /ApEinfo_fwdcolor=#b4abac
ORIGIN
        1 caaaaaaggg aataagggcg acacggaaat gttgaatact catactcttc ctttttcaat
       61 attattgaag catttatcag ggttattgtc tcatgagcgg atacatattt gaatgtattt
      121 agaaaaataa acaaataggg gttccgcgca catttccccg aaaagtgcca cctgagtcta
      181 agaaaccatt attatcatga cattaaccta taaaaatagg cgtatcacga ggccctttcg
      241 tcttcaagaa ttcgtttaaa cggccggcca gatccaggtc gcagcggccg cCCTAAGCCA
      301 GCGATTTCGT TACCTAATCG CGGGATCAGC TTACCTAAGC TGCAGATTAT CCTAGGATCA
      361 TAATTATGAC GGCGGACGCG ACACTCGGCT CGGTTTTTTT TATTATTTTT GAAAGATGCG
      421 AACGCATTGC TGGGCGGCAA AAAACTTAAG CCGGGGATTA AACCGGATTA AAGTCACATT
      481 GTTCTCATTT TTTCCTCTCC TTTCGAGCTA ACTAATTACC CCGGGAAAAT TACCCATTTG
      541 GCTTGCGCGG AAATTCGCGA AAACGCCTGA ACTGCGTTTT TTGTAACGAA TTTTCGACAA
      601 CGAGTCTTTT TTATGGTGTG AGaaaaaaaa aaaaaaaaaa CGGTGGGCAA TAAAAATGAA
      661 TCGATTAGAA AAAAGGTGGG TGGCTAAGCG AAAAACGAGA TGCCGGAATT GAAACGAAGA
      721 ATGGTTCTTG TTGCTTTTTG ACTTTTTTAC AAGCCTTTTG TGCGTTTTTT CCCGTTTTTA
      781 CGCGGAATTC CTCTGCCTGA TGCAACAAAT GAAAGTCAAA TGGAAAATCT TCTGGGAAGT
      841 CAGCTAACGA GTTTTTGTTA AGAGTATACC TTAGACATGG TTTAGTACAT CGGTTGAAGT
      901 TTTATATTTT ATAATACTAG CCACACTTCG GAGTGAAAAA GTCAAGGTTC CTGTCTTTGG
      961 GTCTGAACAA CCCTTTTGGT ACAATGCGCG CCCATAAAAG GGTTAAGCAC ATCGGTTAGC
     1021 GGCATAAAAG GGTTAAACAG GTAGCTCCTT CTTTCTTTTT GGCTTTGAGC AAACAACAAT
     1081 AAATATTCAT AAAAAGAGTT AAGTGCCGCC ATAAGGCTCT TTGTTTACAC AAAGGAGAAA
     1141 TTATGTTGGA AGTTGACTTT TTGATCATAA AAAACGCCCA TCCTGTCTAG TTTTTCCCAG
     1201 TTTCCTATAT ATATCCTGGC CCGCCTAGAG CTCAGCATCA GTTGCTCAGC AGCATTCCAA
     1261 GCGAACAGAT CATACAGCAG ATCCTCAgga tcctacggta cttattgcca agaaagcacg
     1321 agcatcagcc gtgcctccag gtcgaatctt caaacgacga cgatcacgcg tcgctccagt
     1381 attccagggt tcatcagatc ctacggtact tattgccaag aaagcacgag catcagccgt
     1441 gcctccaggt cgaatcttca aacgacgacg atcacgcgtc gctccagtat tccagggttc
     1501 atcagatcct acggtactta ttgccaagaa agcacgagca tcagccgtgc ctccaggtcg
     1561 aatcttcaaa cgacgacgat cacgcgtcgc tccagtattc cagggttcat cagatcctac
     1621 ggtacttatt gccaagaaag cacgagcatc agccgtgcct ccaggtcgaa tcttcaaacg
     1681 acgacgatca cgcgtcgctc cagtattcca gggttcatca gatcctacgg tacttattgc
     1741 caagaaagca cgagcatcag ccgtgcctcc aggtcgaatc ttcaaacgac gacgatcacg
     1801 cgtcgctcca gtattccagg gttcatcaga tcctacggta cttattgcca agaaagcacg
     1861 agcatcagcc gtgcctccag gtcgaatctt caaacgacga cgatcacgcg tcgctccagt
     1921 attccagggt tcatcagatc ctacggtact tattgccaag aaagcacgag catcagccgt
     1981 gcctccaggt cgaatcttca aacgacgacg atcacgcgtc gctccagtat tccagggttc
     2041 atcagatcct acggtactta ttgccaagaa agcacgagca tcagccgtgc ctccaggtcg
     2101 aatcttcaaa cgacgacgat cacgcgtcgc tccagtattc cagggttcat cagatcctac
     2161 ggtacttatt gccaagaaag cacgagcatc agccgtgcct ccaggtcgaa tcttcaaacg
     2221 acgacgatca cgcgtcgctc cagtattcca gggttcatca gatcctacgg tacttattgc
     2281 caagaaagca cgagcatcag ccgtgcctcc aggtcgaatc ttcaaacgac gacgatcacg
     2341 cgtcgctcca gtattccagg gttcatcaga tcctacggta cttattgcca agaaagcacg
     2401 agcatcagcc gtgcctccag gtcgaatctt caaacgacga cgatcacgcg tcgctccagt
     2461 attccagggt tcatcagatc ctacggtact tattgccaag aaagcacgag catcagccgt
     2521 gcctccaggt cgaatcttca aacgacgacg atcacgcgtc gctccagtat tccagggttc
     2581 atcggatcta tgttccagga caaagggtgg attcttgtga ccctgatcac cttggtgacg
     2641 ccgtcttggg ctgcttacaa acttcaggag cgatatagtt ggagccagct ggactttgct
     2701 ttcccgaata cccgactaaa ggaccaagct ctggctagtg gagattatat tccgcaaaat
     2761 gctctacctg ttggagtcga acactttggc aatcggttat tcgtcactgt tccccgctgg
     2821 cgtgatggta agtggaagtt aaatatgaag cccttgggga gatcgtaaat gggacattct
     2881 tacttagggc atcagagata tctgattgag tggttgacag ttttatatgg cttgtttgac
     2941 atgatgtaaa aacacaaaat tcatttagtt taggtattca aataagagct tgttatttat
     3001 tttagaattt ggagaacatt tttttgtctt tctacccttc ttagaaaata atattgtttt
     3061 gtacaattta attttaaact agtacagacg aaaaatgtat ttttttattt gtatgccttt
     3121 tcaccatttt ggcagaggaa taaatatgac aatatatttt gagagcaccc tcatgtaaag
     3181 gttttagcgt ggcgacctct cataaatccg gttggtacct gcgcgttatt ttaacatttt
     3241 aaacaattaa ccgttgtaaa atcgaagcca atagcatggc attggcttta tactgtatta
     3301 aattgtatta tattaccatc cgaattgtaa agacttcttc agggccgcca catagaaatg
     3361 gaaatccaat cacaaacaat aacttatggc attagctatt aaccgacgat tagctgtcag
     3421 ttcaacaaat gtaagagtgg cgaaatgttt aaatgcgaag gcattgttct gtgactcacg
     3481 ttttattatt aatcacacaa atgattttgc ttcaaaatta tttggcttac acaataatca
     3541 aaatttttat gaaatagttg aaacacaaaa ctaggaaatt ttaaaaagca atgaaactaa
     3601 aaaacccaat tgctaagatt atatgatgcg catacaaata cttcagtacg tctaggaatg
     3661 ctttcgatga ttgattagtt tttatgcatg gcttacaatt ggtatttaca cagaaaaaca
     3721 cggcgatgtt aataaatttt gtacatatgt tcttaagcag tccgaaacac ccaaacttct
     3781 gactaaactt aaaaaaacac gctcttcaag gatatcttaa tgtcacttat aatgtaatgg
     3841 tattgtatta ttaagtatat caaaatattc tggcccagcc ttgaggtctc tttttaaaaa
     3901 gatatcgact gactacctcc agtcaatgaa ataatagccc agaaggccga atcggcaaaa
     3961 aataaacccc aagttacggc aaacaaaaca tagtgaaagt tgtggcaaag tggaacattt
     4021 aaaggcatgc ttcaatggcc atcgaagcaa atcaattagt caaagcaaat cggtagtggc
     4081 aacaacaggc tacagaatac ctataagtga cagttatggg gtatgattaa ttataaatat
     4141 tatcattgac caccaatgct gggctcaatt ggaaaaacta ttctatgaag atttgagtaa
     4201 ataaattttg atttaaaaaa gcccatggtt atcgcgacaa ctagctacgg gacaagatta
     4261 ctgtttaaaa tcaagtgtga aatatcaaaa tcaaaatcgg attccgatcg ggaagttgta
     4321 tccgattctg aaactaaaac acagaattgc caacattttc cgatatcgac tcagctcacg
     4381 tatttcatac agattcatta ggccaccagc cattgaataa tataccccag tcaattgagc
     4441 tactcgatag ttgatcaact tagcttttgt caacgagtga acgcataaac tactacatca
     4501 acgatatttg cggcccattc caagctaaaa gttcatctta attacaaata agattagaaa
     4561 aaatatctga atgaaaaaaa tgttgagaca tatttctttg gaaaaggaga acctcaagac
     4621 agtcgaaaaa attgtttaca atgaaaatgt tgaaaatcat gaagcagata aatctgtcag
     4681 ttgcgaggtt ttaggactga aagagcacat gtcaaaatat aaatttgttc aaatacttta
     4741 tatttgactg aattagattg ttattttaaa agttatgaat taaataaaga ttgaaaggtg
     4801 cattatgctc aaatgtatat ttatcgcaac ccccggttac tttgtaaagc aaaaacgcct
     4861 ggtttgattt ttaagaagat gggtcggtaa atcgataaaa gctatatttt ctggtcgttg
     4921 cagtctcact cgcctgctat aaaaacatta aaagttccca gaaacaataa atgtctttaa
     4981 attcaattaa cgaagaaata aagaaggaaa agaactggag cggaaatcgg tcgaaatact
     5041 gccaatggcc acatatacat ttaacagcga tatatggtat acatattgat aatgatgtca
     5101 gacgcaattg cttcagacgg ctaatgacat cgcaaattgc acgcaacttg caatagtgcc
     5161 aattatgact gaagtacata tagccgggga tcttttaaca taaacttcca gtagatgtac
     5221 aagcagaaaa aagagccatt agcacggcag ttaccattgc ttatgattcc ttgtgtccaa
     5281 aataatgaca aataggtata taaataatta aatgccaaac ataagcgatt ctaatttacc
     5341 tttacatctg tatgcattta catattatcc agaaaacaga cagcgataac ttgcaacatt
     5401 gcttagtata ataatccaaa gaaggaattt aggcagaaat tccagttaat taaatattca
     5461 aaacaaactt tatttagtgc ctcaataata gtttggccct gctaattctc ctattttatt
     5521 ttttagggat tccggccact ctgacctata taaacatgga ccgcagtttg acgggttcac
     5581 cggagctaat tccgtatcca gattggcgct caaatacagc tggagattgc gccaacagta
     5641 ttaccactgc ctaccgcatt aaagtggatg agtgtggtcg gctgtgggtt ttggacactg
     5701 gaaccgtggg catcggcaat accaccacta atccgtgccc ctatgcggta aatgtctttg
     5761 acttgaccac ggatacgcga attcggagat acgagctacc tggcgtggac acaaatccaa
     5821 atactttcat agctaacatt gccgtggata taggcaaaaa ttgcgatgat gcatatgcct
     5881 attttgccga tgaattggga tacggcttga ttgcttactc ctgggaactg aacaagtcct
     5941 ggagattctc ggcacattcg tattttttcc ccgatccatt gaggggcgat ttcaatgtcg
     6001 ctggtattaa cttccaatgg ggcgaggagg gtatatttgg tatgtccctt tcgcccattc
     6061 gatcggatgg ttatcgtacc ctgtacttta gtccgttagc aagtcatcga caatttgccg
     6121 tatccacgag gattttgagg gatgaaacca ggacggaaga tagctatcat gactttgttg
     6181 ccttagatga acggggtcca aactcccata ccacttcacg tgtgatgagc gatgatggaa
     6241 ttgagctgtt caatttaata gatcaaaatg cagtgggttg ctggcactca tcaatgccgt
     6301 actcaccgca atttcatggc attgtggatc gcgatgacgt tggcttagtt tttccggccg
     6361 atgtgaaaat tgatgagaac aaaaacgttt gggttctatc cgataggatg cccgttttct
     6421 tgctgtctga cttggattat tcagatacta atttccgaat ttacacggct cccttggcca
     6481 ctttaattga gaatactgtg tgtgatttga ggaataacgc ctatgggccg ccaaataccg
     6541 tttcaatacc aaaacaagcc gttttgccaa tgggtccacc gttatatacg aaacaatatc
     6601 gtcctgtctt gccacagaaa cctcagacca gctgggcttc ctcgccgcct cctccaagtc
     6661 gcacttattt gcccgccaat tcaggcaatg tagtctccag tattagtgtc tctacaaatt
     6721 ctgtgggtcc tgcaggagtg gaggtgccaa aggcctatat tttcaaccag cacaacggca
     6781 taaattacga gacaagtggt ccccatctat ttcccaccca tcaacccgcc caaccgggtg
     6841 gccaggatgg tgggttaaaa acttatgtga atgcccgcca atctgggtgg tggcatcatc
     6901 agcatcaagg ttaaggcgcg ccactaagcg tcgcgccact tcaacgctcg atgggagcgt
     6961 cattggtggg cggggtaacc gtcgaaatca gtgtttacgc ttccaatcgc aacaaaaaat
     7021 tcactgcaac actgaaaagc atacgaaaac gatgaagatt gtacgagaaa ccataaagta
     7081 ttttatccac aaagacacgt atagcanaaa agccaagtta actcggcgat aagttgtgta
     7141 cacaagaata aaatcggcca gattcagtgt tgtcagaaat aagaaaaccc cactatgttt
     7201 ttctttgcct tttctttctc ccagcgatca ttcatttcgt ggtgaaagaa cggggtcatt
     7261 gcacggagtt tcgactgcgg gaaagcagag ctgccgttca cttcgtctat aattagcgct
     7321 ttctattttc cccgattcgg gccgctgctg cgcttttccg cctgctgttt gtggcaagtg
     7381 tagcagcagg ctgtgcacgc agtgtggcat gcacttggct ttccaccgtt ggtatcgatt
     7441 ctctgggacg atgagtcatt cctttcgggg ccacagcata atcgttgcca gctcaccgaa
     7501 atggtgactt catttcttaa ctgccgtcaa gcatgcgatt gtacatacat acatatttat
     7561 atatgtacat atttatgtga ctatggtagg tcgatataat agcaatcaac gcaagcaaat
     7621 gtgtcagtcc tgcttacagg aacgattcta tttagtaatt ttcgttgtat aaagtaatta
     7681 tgtatgtatg taagccccat aaatctgaaa caattaggca aaaccatgcg aagctctcta
     7741 gagtcgacct gcatctacac aaggaacaaa cactggatgt cactttcagt tcaaattgta
     7801 acgctaatca ctccgaacag gtcacaaaaa attaccttaa aaagtcataa tattaaatta
     7861 gaataaatat agctgtgagg gaaatatata caaatatatt ggagcaaata aattgtacat
     7921 acaaatattt attactaatt tctattgaga cgaaatgaac cactcggaac catttgagcg
     7981 aaccgaatcg cgcggaacta acgacagtcg ctccaaggtc gtcgaacaaa aggtgaatgt
     8041 gttgcggaga gcgggtggga gacagcgaaa gagcaactac gaaacgtggt gtggtggagg
     8101 tgaattatga agagggcgcg cgatttgaaa agtatgtata taaaaaatat atcccggtgt
     8161 tttatgtagc gataaacgag tttttgatgt aaggtatgca ggtgtgtaag tcttttggtt
     8221 agaagacaaa tccaaagtct acttgtgggg atgttcgaag gggaaatact tgtattctat
     8281 aggtcatatc ttgtttttat tggcacaaat ataattacat tagctttttg agggggcaat
     8341 aaacagtaaa cacgatggta ataatggtaa aaaaaaaaaa caagcagtta tttcggatat
     8401 atgtcggcta ctccttgcgt cgggcccgaa gtcttagagc cagatatgcg agcacccgga
     8461 agctcacgat gagaatggcc agacccacgt agtccagcgg cagatcggcg gcggagaagt
     8521 taagcgtctc caggatgacc ttgcccgaac tggggcacgt ggtgttcgac gatgtgcagc
     8581 taatttcgcc cggctccacg tccgcccatt ggttaatcag cagaccctcg ttggcgtaac
     8641 ggaaccatga gaggtacgac aaccatttga ggtatactgg caccgagccc gagttcaaga
     8701 anaagccgcc aaagagcagg aatggtatga taaccggcgg acccacagac agcgccatcg
     8761 aggtcgagga gctggcgcag gatattagat atccgaagga cgttgacaca ttggccacca
     8821 gagtgaccag cgccaggcag ttgaagaagt gcagcactcc ggcccgcagt ccgatcatcg
     8881 gataggcaat cgccgtgaag accagtggca ctgtgagaaa aagcggcaat tcggcaatcg
     8941 ttttgcccag aaagtatgtg tcacagcgat aaagtcgact tcgggcctcc ctcataaaaa
     9001 ctggcagctc tgaggtgaac acctaaatcg aatcgattca ttagaaagtt agtaaattat
     9061 tgaaatgcaa atgtattcta aacatgactt acatttatcg tggcaaagac gttttgaaag
     9121 gtcatgttgg tcaggaagag gaagatggct ccgttgatat tcatcacacc cacttgcgtg
     9181 agttgttggc ccaaaaagat gaggccaatc aagatggcaa ccatctgcaa attaaaatgt
     9241 tactcgcatc tcattaatat tcgcgagtta aatgaaattt atttatcttc tgcaaaacta
     9301 taaactatac atctcattga aaaaaactaa gaagggtgtg gaatcaggca attctatcta
     9361 aaatctagcg aatttgtttc caagaattgt aagcgttata tcatttgttt ccactggaac
     9421 cactcaccgt tgtctgaata agtcgcactt ttacgaggag tggttccttg agcaccgaca
     9481 gccaggatcg ccacaggacc gcccggaact gcatgaacca ggtggccttg taggtgtacc
     9541 cattctccgg ctgctccagt ggcttctcca gatttttggt ggccaacaac tgctccatat
     9601 cccgggctac tttgctaatg gcaaaattgt cgcatatctt ggcgatccga tcacgggact
     9661 cgatctcccg tccgggcaca acggccaaca cctgtacgta aaagtccgcc ggattgtagt
     9721 tggtaggaca ctgggcaccc acgctggata ggagttgaga tgttatgtaa tactagatac
     9781 ccttaataaa cacatcgaac tcactaggaa aagaagtcga cggcttcgct gggagtgccc
     9841 aagaaagcta ccctgccctc ggccatcaga aggatcttgt caaagagctc aaacagctcg
     9901 gaagacggct gatgaatggt caggatgacg gtcttgccct tctgcgacag cttcttcagc
     9961 acctggacga cgctgtgggc ggtaaaggag tccagtccgg aggtgggctc atcgcagatc
    10021 agaagcggcg gatcggttag agcctcggag gcgaatgcca gacgcttcct ttctccgccg
    10081 gacagacctt tcaccctgcc gggcacaccg atgatcgtgt gctgacattt gctgagcgaa
    10141 agctcctgga tcacctgatc cacgcgggcc actcgctgcc gataggtcag atgtcgtggc
    10201 atccgcacca tggcttggaa aatcaggtgt tccctggccg ttagggagcc gataaagagg
    10261 tcatcctgct ggacataggc gcacctggcc tgcatctcct tggcgtccac aggttggcca
    10321 ttgagcagtc gcatcccgga tggcgatact tggatgccct gcggcgatcg aaaggcaagg
    10381 gcattcagca gggtcgtctt tccggcaccg gaactgccca tcacggccaa aagttcgccc
    10441 ggataggcca cgccgcaaac tgagtttcaa attggtaatt ggacccttta ttaagatttc
    10501 acacagatca gccgactgcg aatagaaact caccgttctt gagcaaatgt ttcctgggcg
    10561 ccggtatgtg tcgctcgttg cagaatagtc cgcgtgtccg gttgaccagc tgccgccatc
    10621 cggagcccgg ctgattgacc gccccaaaga tgtccatatt gtgccaggca taggtgaggt
    10681 tctcggctag ttggccgctc cctgaaccgg agtcctccgg cggactgggt ggccggagcg
    10741 tgccgtagtt tttggcctgc ccgaagccct ggttaatgca gctctgcgaa gccgctccgc
    10801 tgtcaccctg caatgatagg ggatctcaaa tatcaactac aagcgttatg ctcatctaac
    10861 cccgaacaaa aagtaccccg aagtatccta cgaagtaggt ttatactttt atttattttt
    10921 tgtgcatcta ggatcagctt aaaatatctg gttgttatat tttttgtaaa aaagaatata
    10981 gtcgaaaatg aatgccttta gatgtcttga tcatgatatg atctcaaaaa ttgtcttata
    11041 tagcgagaac agctaccaga ataatctgtt tcgtgtcact atttgtttgt gcaattgcgg
    11101 tttgggattt ttgtgggtcg cagttctcac gccgcagaca atttgatgtt gcaatcgcag
    11161 ttcctataga tcaagtgaac ttaagatgta tgcacatgta ctactcacat tgttcagatg
    11221 ctcggcagat gggtgtttgc tgcctccgcg aattaatagc tcctgatcct cttggcccat
    11281 tgccgggatt tttcacactt tcccctgctt acccacccaa aaccaatcac caccccaatc
    11341 actcaaaaaa caaacaaaaa taagaagcga gaggagtttt ggcacagcac tttgtgttta
    11401 attgatggcg taaaccgctt ggagcttcgt cacgaaaccg ctgacaaaat gcaactgaag
    11461 gcggacattg acgctacgta acgctacaaa cggtggcgaa agagatagcg gacgcagcgg
    11521 cgaaagagac ggcgatattt ctgtggacag agaaggaggc aaacagcgct gactttgagt
    11581 ggaatgtcat tttgagtgag aggtaatcga aagaacctgg tacatcaaat acccttggat
    11641 cgaagtaaat ttaaaactga tcagataagt tcaatgatat ccagtgcagt aaaaaaaaaa
    11701 aatgtttttt ttatctactt tccgcaaaaa tgggttttat taacttacat acatactagg
    11761 cgcgcccata tgttcggctt gtcgacatgc ccgccgtgac cgtcgagaac ccgctgacgc
    11821 tgccccgcgt atccgcaccc gccgacgccg tcgcacgtcc cgtgctcacc gtgaccaccg
    11881 cgcccagcgg tttcgagggc gagggcttcc cggtgcgccg cgcgttcgcc gggatcaact
    11941 accgccacct cgacccgttc atcatgatgg accagatggg tgaggtggag tacgcgcccg
    12001 gggagcccaa gggcacgccc tggcacccgc accgcggctt cgagaccgtg acctacatcg
    12061 tcgacggtaa catgtgagca aaaggccagc aaaaggccag gaaccgtaaa aaggccgcgt
    12121 tgctggcgtt tttccatagg ctccgccccc ctgacgagca tcacaaaaat cgacgctcaa
    12181 gtcagaggtg gcgaaacccg acaggactat aaagatacca ggcgtttccc cctggaagct
    12241 ccctcgtgcg ctctcctgtt ccgaccctgc cgcttaccgg atacctgtcc gcctttctcc
    12301 nttcgggaag cgtggcgctt tctcatagct cacgctgtag gtatctcagt tcggtgtagg
    12361 tcgttcgctc caagctgggc tgtgtgcacg aaccccccgt tcagcccgac cgctgcgcct
    12421 tatccggtaa ctatcgtctt gagtccaacc cggtaagaca cgacttatcg ccactggcag
    12481 cagccactgg taacaggatt agcagagcga ggtatgtagg cggtgctaca gagttcttga
    12541 agtggtggcc taactacggc tacactagaa gaacagtatt tggtatctgc gctctgctga
    12601 agccagttac cttcggaaaa agagttggta gctcttgatc cggcaaacaa accaccgctg
    12661 gtagcggtgg tttttttgtt tgcaagcagc agattacgcg cagaaaaaaa ggatctcaag
    12721 aagatccttt gatcttttct acggggtctg acgctcagtg gaacgaaaac tcacgttaag
    12781 ggattttggt catgagatta tcaaaaagga tcttcaccta gatcctttta aattaaaaat
    12841 gaagttttaa atcaatctaa agtatatatg agtaaacttg gtctgacagt taccaatgct
    12901 taatcagtga ggcacctatc tcagcgatct gtctatttcg ttcatccata gttgcctgac
    12961 tccccgtcgt gtagataact acgatacggg agggcttacc atctggcccc agtgctgcaa
    13021 tgataccgcg agacccacgc tcaccggctc cagatttatc agcaataaac cagccagccg
    13081 gaagggccga gcgcagaagt ggtcctgcaa ctttatccgc ctccatccag tctattaatt
    13141 gttgccggga agctagagta agtagttcgc cagttaatag tttgcgcaac gttgttgcca
    13201 ttgctacagg catcgtggtg tcacgctcgt cgtttggtat ggcttcattc agctccggtt
    13261 cccaacgatc aaggcgagtt acatgatccc ccatgttgtg caaaaaagcg gttagctcct
    13321 tcggtcctcc gatcgttgtc agaagtaagt tggccgcagt gttatcactc atggttatgg
    13381 cagcactgca taattctctt actgtcatgc catccgtaag atgcttttct gtgactggtg
    13441 agtactcaac caagtcattc tgagaatagt gtatgcggcg accgagttgc tcttgcccgg
    13501 cgtcaatacg ggataatacc gcgccacata gcagaacttt aaaagtgctc atcattggaa
    13561 aacgttcttc ggggcgaaaa ctctcaagga tcttaccgct gttgagatcc agttcgatgt
    13621 aacccactcg tgcacccaac tgatcttcag catcttttac tttcaccagc gtttctgggt
    13681 gagcaaaaac aggaaggcaa aatgccg
//
